# Supplementary material
Source: PubMed Central journal article supplement (PMC3417157)
Supplement: NIHMS375280-supplement-1.pdf [file NIHMS375280-supplement-1.pdf]

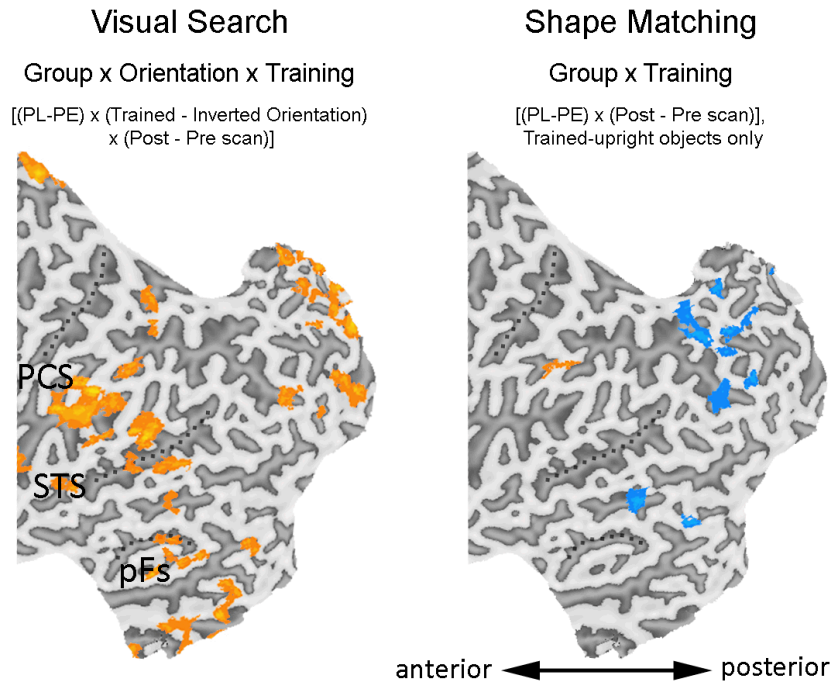

*Supplementary Figure 1.* Different training effects for the two groups with different training experiences. The left panel shows areas with significantly larger inversion effect for the PL group than the PE group (orange regions) during visual search. The right panel shows areas with significantly larger training effect for PL than for PE (orange) or larger training effect for PE than PL (blue) during shape matching with trained-upright objects. PCS – post-central sulcus; STS – superior temporal sulcus; pFs – posterior fusiform gyrus.
